# Supplementary material
Source: Springer Nature journal article supplement (https://www.springermedizin.de/resource/supplementary/12937_2004_51_MOESM3_ESM.pdf/25654366)

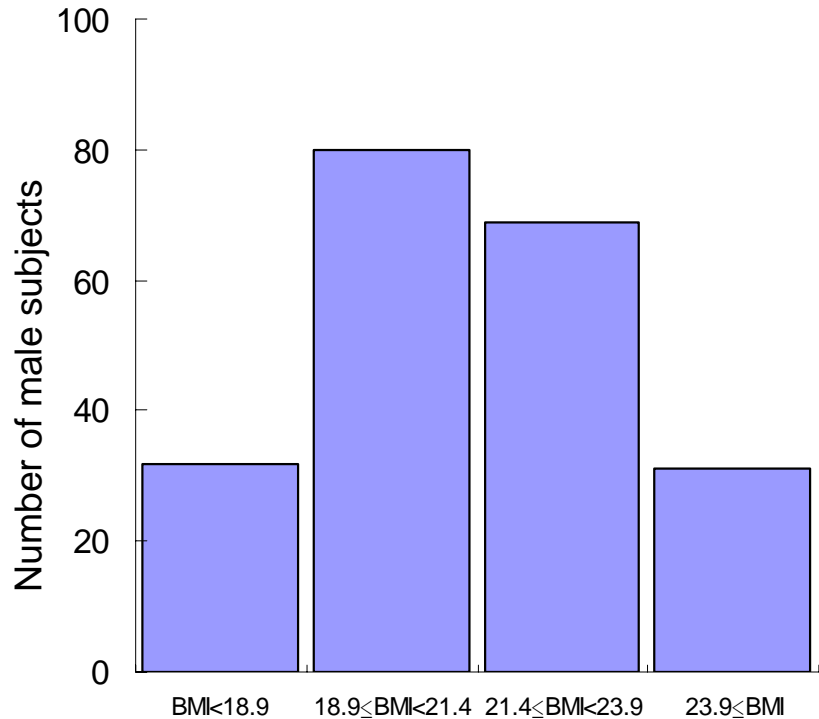

**Male**

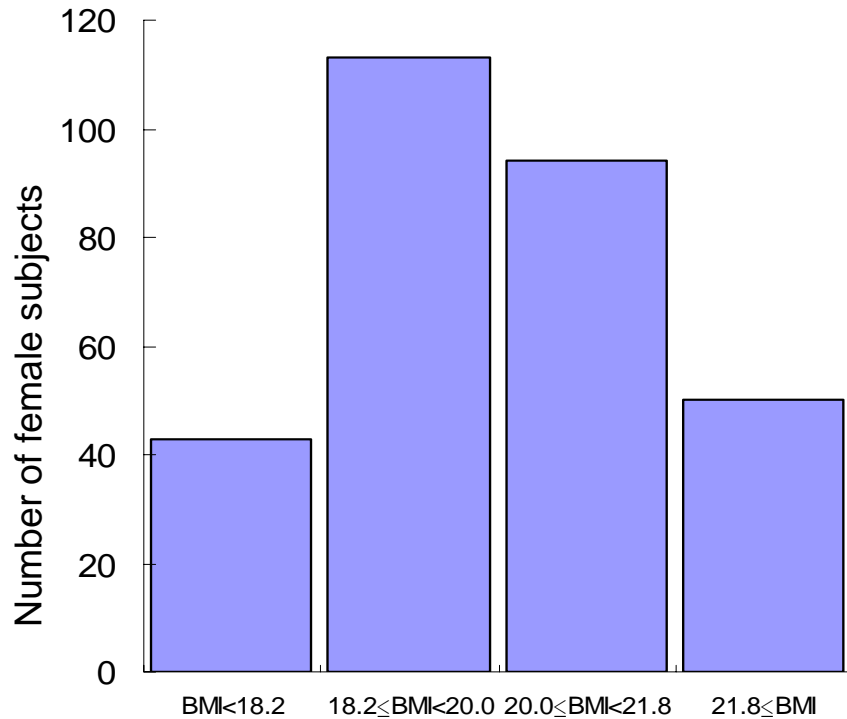

**Female**

Supplement: MOESM3 [file 25654366]
